# Supplementary material
Source: MDPI journal article supplement (https://www.mdpi.com/2073-4395/10/12/1849)
Supplement: s1 [file s1]

**Table S1.** Effects of light conditions on fresh weight and dry weight of fruits, leaves and stems.(88 DAT). Values are average  $\pm$  DS of three replications.

| Supplemental<br>Light (SL)  | Leaves                | Stem             | Fruits             | Leaves                   | Stem           | Fruits        |
|-----------------------------|-----------------------|------------------|--------------------|--------------------------|----------------|---------------|
|                             | Fresh Weight          |                  |                    | Dry Weight               |                |               |
|                             | g plant <sup>-1</sup> |                  |                    | g 100 g FW <sup>-1</sup> |                |               |
| Control (NL)                | 534.5 $\pm$ 141.2     | 391.8 $\pm$ 82.4 | 1110.1 $\pm$ 101.1 | 7.9 $\pm$ 0.4            | 9.9 $\pm$ 1.1  | 6.4 $\pm$ 0.5 |
| R+B                         | 479.5 $\pm$ 93.6      | 383.0 $\pm$ 38.1 | 1233.3 $\pm$ 97.4  | 8.7 $\pm$ 0.3            | 8.8 $\pm$ 0.8  | 5.8 $\pm$ 0.6 |
| R+B+FR                      | 456.5 $\pm$ 57.4      | 395.9 $\pm$ 69.3 | 1237.6 $\pm$ 132.7 | 8.9 $\pm$ 0.6            | 10.7 $\pm$ 0.5 | 5.6 $\pm$ 0.4 |
| Significance <sup>(1)</sup> |                       |                  |                    |                          |                |               |
| NL vs SL                    | NS                    | NS               | NS                 | **                       | NS             | NS            |
| R+B vs R+B+FR               | NS                    | NS               | NS                 | NS                       | *              | NS            |

<sup>(1)</sup> Significance: \* and \*\* respectively for  $p \leq 0.05$  and  $p \leq 0.01$ ; NS, not significant.**Table S2.** Effects of light conditions on fresh weight and dry weight of fruits, leaves and stems.(110 DAT). Values are average  $\pm$  DS of three replications.

| Supplemental<br>Light (SL)  | Leaves                | Stem             | Fruits             | Leaves                   | Stem           | Fruits        |
|-----------------------------|-----------------------|------------------|--------------------|--------------------------|----------------|---------------|
|                             | Fresh Weight          |                  |                    | Dry Weight               |                |               |
|                             | g plant <sup>-1</sup> |                  |                    | g 100 g FW <sup>-1</sup> |                |               |
| Control (NL)                | 408.8 $\pm$ 65.6      | 155.5 $\pm$ 5.9  | 966.0 $\pm$ 194.1  | 9.0 $\pm$ 0.5            | 8.8 $\pm$ 1.0  | 7.4 $\pm$ 2.1 |
| R+B                         | 364.4 $\pm$ 58.9      | 164.3 $\pm$ 13.8 | 1260.0 $\pm$ 207.3 | 9.5 $\pm$ 0.4            | 10.2 $\pm$ 2.7 | 6.5 $\pm$ 1.5 |
| R+B+FR                      | 407.6 $\pm$ 73.2      | 200.0 $\pm$ 10.8 | 1297.6 $\pm$ 184.4 | 10.2 $\pm$ 0.4           | 10.0 $\pm$ 2.6 | 7.0 $\pm$ 1.9 |
| Significance <sup>(1)</sup> |                       |                  |                    |                          |                |               |
| NL vs SL                    | NS                    | **               | NS                 | *                        | NS             | NS            |
| R+B vs R+B+FR               | NS                    | NS               | NS                 | *                        | NS             | NS            |

<sup>(1)</sup> Significance: \* and \*\* respectively for  $p \leq 0.05$  and  $p \leq 0.01$ ; NS, not significant.**Table S3.** Effects of light conditions on fresh weight and dry weight of fruits, leaves and stems.(137 DAT). Values are average  $\pm$  DS of three replications.

| Supplemental<br>Light (SL)  | Leaves                | Stem             | Fruits            | Leaves                   | Stem           | Fruits        |
|-----------------------------|-----------------------|------------------|-------------------|--------------------------|----------------|---------------|
|                             | Fresh Weight          |                  |                   | Dry Weight               |                |               |
|                             | g plant <sup>-1</sup> |                  |                   | g 100 g FW <sup>-1</sup> |                |               |
| Control (NL)                | 406.84 $\pm$ 95.9     | 377.5 $\pm$ 29.2 | 476.3 $\pm$ 223.2 | 14.3 $\pm$ 1.3           | 11.3 $\pm$ 1.1 | 8.3 $\pm$ 1.4 |
| R+B                         | 554.83 $\pm$ 85.2     | 445.6 $\pm$ 21.6 | 564.3 $\pm$ 284.3 | 13.4 $\pm$ 1.5           | 10.9 $\pm$ 1.1 | 8.1 $\pm$ 1.7 |
| R+B+FR                      | 426.87 $\pm$ 88.8     | 424.2 $\pm$ 82.5 | 670.3 $\pm$ 248.1 | 12.8 $\pm$ 1.9           | 14.2 $\pm$ 2.5 | 7.9 $\pm$ 1.5 |
| Significance <sup>(1)</sup> |                       |                  |                   |                          |                |               |
| NL vs SL                    | NS                    | NS               | NS                | NS                       | NS             | NS            |
| R+B vs R+B+FR               | NS                    | NS               | NS                | NS                       | NS             | NS            |

<sup>(1)</sup> Significance: \* and \*\* respectively for  $p \leq 0.05$  and  $p \leq 0.01$ ; NS, not significant.
